# Supplementary material
Source: PubMed Central journal article supplement (PMC4810792)
Supplement: JHC614303_Supp.pdf [file JHC614303_Supp.pdf]

JHC—Journal of Histochemistry & Cytochemistry  
DOI: 10.1369/0022155415614303  
Authors: Irwin et al.  
Copyright © 2015

**Online Supplement for:**

**Semi-automated Digital Image Analysis of Pick's Disease and TDP-3  
Proteinopathy**

in

***Journal of Histochemistry & Cytochemistry***

By

David J Irwin, MD,<sup>1,2</sup>, Matthew D. Byrne, BA,<sup>1,2</sup>, Corey T. McMillan, PhD<sup>1</sup>, Felicia Cooper, MS,<sup>1,2</sup>, Steven E. Arnold, MD<sup>2,3</sup>, Edward B. Lee, MD, PhD<sup>1,4</sup>, Vivianna M. Van Deerlin, MD, PhD<sup>2</sup>, Sharon X. Xie, PhD<sup>5</sup>, Virginia M.-Y. Lee, PhD, MBA<sup>1,2</sup>, Murray Grossman, MD<sup>1</sup>, and John Q. Trojanowski, MD, PhD<sup>1,2</sup>

<sup>1</sup> University of Pennsylvania Frontotemporal Degeneration Center, Department of Neurology, <sup>2</sup> Center for Neurodegenerative Disease Research Department of Pathology and Laboratory Medicine, <sup>3</sup> University of Pennsylvania Memory Center, <sup>4</sup> Translational Neuropathology Research Lab, <sup>5</sup> Department of Biostatistics and Epidemiology

Perelman School of Medicine, University of Pennsylvania, Philadelphia, PA 19104, USA

Correspondence to:

David J. Irwin, MD

Instructor of Neurology

Frontotemporal Degeneration Center (FTDC)

University of Pennsylvania Perelman School of Medicine

Hospital of the University of Pennsylvania

3600 Spruce Street, Philadelphia, PA 19104

(215)-662-7682

[dirwin@mail.med.upenn.edu](mailto:dirwin@mail.med.upenn.edu)

JHC—Journal of Histochemistry & Cytochemistry  
DOI: 10.1369/0022155415614303  
Authors: Irwin et al.  
Copyright © 2015

Supplemental Figures: 3 (Supplementary Figure 1-3)

Supplemental Tables: 5 (Supplementary Tables 1-5)

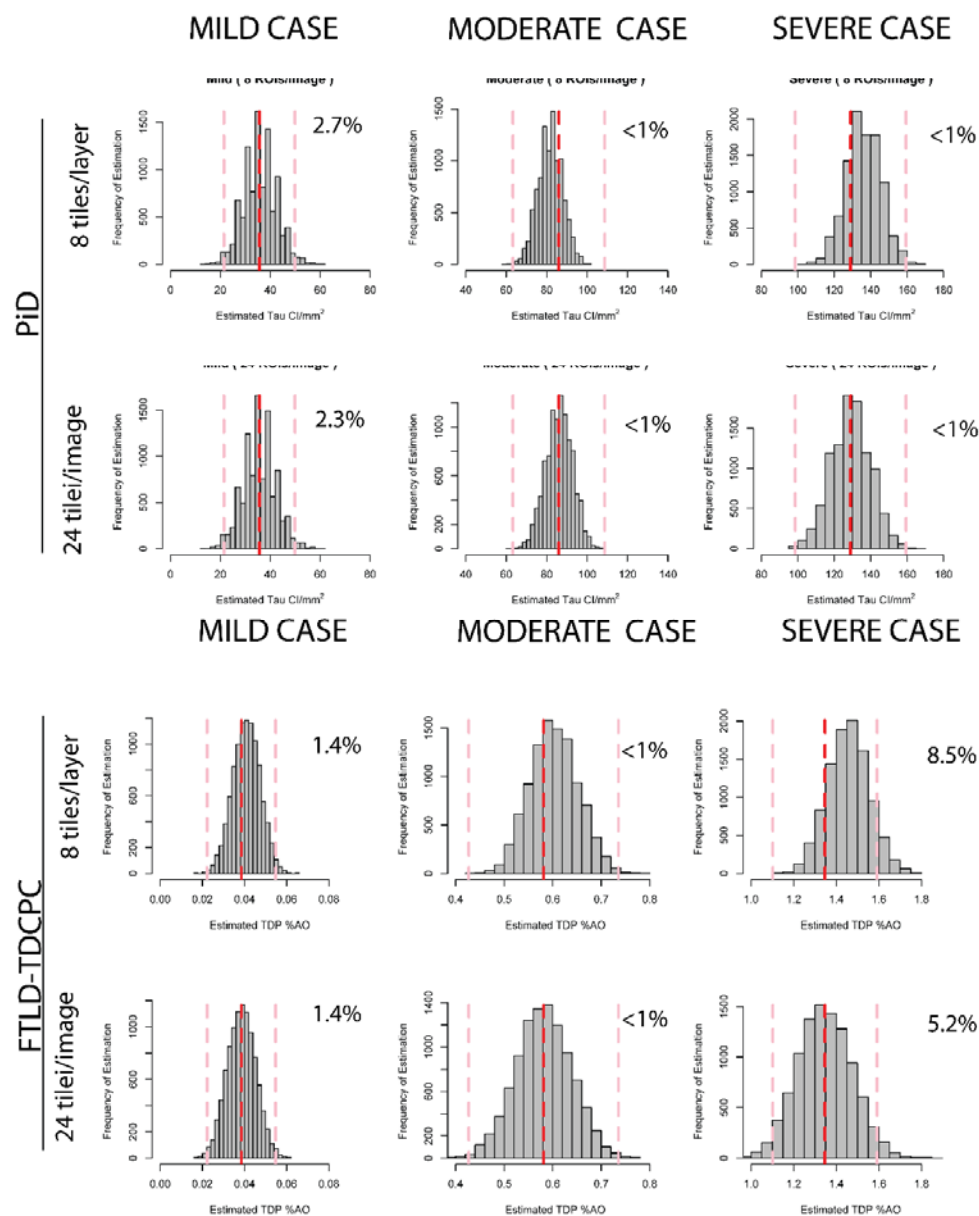

**Supplementary Figure 1. Permutation analysis to determine optimal random sampling size.** Histograms depict the frequency of estimations for mean Tau CI/mm<sup>2</sup> (PiD) and TDP %AO (FTLD-TDPC) obtained from 10,000 permutations for either 8 random tiles per cortical layer (24 total tiles) or 24 random tiles sampled independent of cortical layer in a case with mild, moderate and severe burden of pathology. Red dashed line represents the “true” mean value obtained from the full ROI and pink dashed lines represent the limits of 99% CI. Percentages represent the percentage of

permutation estimations falling outside of the 99% CI. We defined an optimum number of random tiles for sampling is defined as  $\leq 10\%$  of permutation estimates outside of the 99% CI of the true signal; Thus, 24 tiles/image sampling scheme was chosen for analyses.

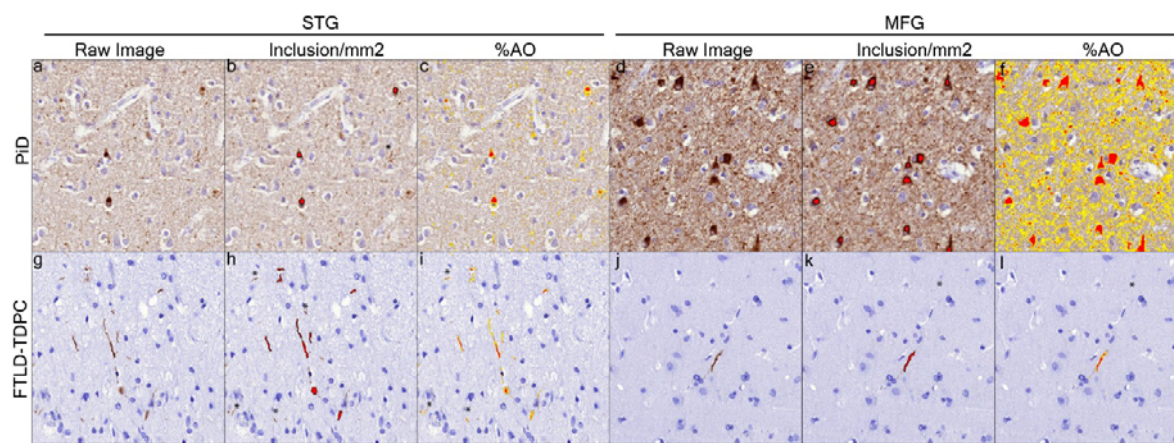

**Supplementary Figure 2. Inclusion/area and %Area occupied digital image analysis for PiD and FTLD-TDPC.** Photomicrographs depict representative images from STG (a-c, g-i) and MFG (d-f, j-l) from PiD (a-f) and FTLD-TDPC (g-l) cases using automated digital image analysis algorithms to detect (red-overlay) tau-positive PBs (b,e) and TDP-43 DNPs (h,k) and total %AO with positive reactivity (red, orange, yellow) for tau (c,f) and TDP-43 (i,l). PiD had a lower burden of pathology in STG compared with MFG and conversely, FTLD-TDPC had a lower inclusion burden in MFG compared with STG. PiD had a large number of additional small dystrophic neurites included in %AO (c,f) not quantified with PB detection algorithms (b,e) while FTLD-TDPC had minimal additional small DNPs in %AO not quantified in inclusion detection algorithms (h, k; asterisks). Scale bar= 100 $\mu$ m.

JHC—Journal of Histochemistry & Cytochemistry  
DOI: 10.1369/0022155415614303  
Authors: Irwin et al.  
Copyright © 2015

**Supplementary Table 1. Accuracy of step-wise variation in digital image analysis algorithm variables to determine optimal algorithm in training and test set images.**

| Path Group | Parameters                      | R <sup>2</sup> Training Set | R <sup>2</sup> Test Set | R <sup>2</sup> Batch #2 | Path Group | Parameters                                          | R <sup>2</sup> Training Set | R <sup>2</sup> Test Set | R <sup>2</sup> Batch #2 |
|------------|---------------------------------|-----------------------------|-------------------------|-------------------------|------------|-----------------------------------------------------|-----------------------------|-------------------------|-------------------------|
| <b>PiD</b> | BR=11.0<br>CT=0.470<br>OD=0.217 | 0.421                       | -                       | -                       | <b>TDP</b> | BR=1.0<br>CT=0.196<br>OD=0.147                      | 0.66                        | -                       | -                       |
|            | BR=11.5<br>CT=0.470<br>OD=0.217 | 0.551                       | -                       | -                       |            | BR=0.2<br>CT=0.196<br>OD= 0.147                     | 0.68                        | -                       | -                       |
|            | BR=12.0<br>CT=0.470<br>OD=0.217 | 0.667                       | -                       | -                       |            | BR=0.4<br>CT=0.196<br>OD= 0.147                     | 0.68                        | -                       | -                       |
|            | BR=11.0<br>CT=0.475<br>OD=0.217 | 0.586                       | -                       | -                       |            | BR=1.7<br>CT=0.196<br>OD= 0.147                     | 0.63                        | -                       | -                       |
|            | BR=11.5<br>CT=0.475<br>OD=0.217 | 0.687                       | -                       | -                       |            | BR=0.4<br>CT=0.196<br>OD=0.157                      | 0.64                        | -                       | -                       |
|            | BR=12.0<br>CT=0.475<br>OD=0.217 | 0.735                       | -                       | -                       |            | BR=0.4<br>CT=0.196<br>OD=0.137                      | 0.69                        | -                       | -                       |
|            | BR=11.0<br>CT=0.480<br>OD=0.217 | 0.707                       | -                       | -                       |            | BR=0.4<br>CT=0.196<br>OD 0.127                      | 0.69                        | -                       | -                       |
|            | BR=11.5<br>CT=0.480<br>OD=0.217 | 0.739                       | -                       | -                       |            | <b>BR=0.4</b><br><b>CT=0.196</b><br><b>OD=0.127</b> | <b>0.70</b>                 | <b>0.90</b>             | <b>0.76</b>             |

|                                                      |              |             |             |  |
|------------------------------------------------------|--------------|-------------|-------------|--|
| BR=12.0<br>CT=0.485<br>OD=0.217                      | 0.723        | -           | -           |  |
| BR=11.5<br>CT=0.480<br>OD=0.175                      | 0.783        | -           | -           |  |
| <b>BR=11.5</b><br><b>CT=0.480</b><br><b>OD=0.155</b> | <b>0.794</b> | <b>0.90</b> | <b>0.83</b> |  |

BR= blur radius (0-30 scale), CT= contrast threshold (0-50 scale), OD=minimal stain optical density (0-2.4 scale). Optimal algorithms were applied to preliminary manual counts in test set and slides stained in separate IHC batch.

**Supplementary Table 2. Optimal Detection Algorithms**

| Parameter                                  | Tau<br>Inclusions/mm2 | Tau %AO           | TDP<br>Inclusions/mm2 | TDP<br>%AO        |
|--------------------------------------------|-----------------------|-------------------|-----------------------|-------------------|
| Object<br>(Pathology)<br>Stain (RGB)<br>OD | 0.838,1.628,1.260     | 0.838,1.628,1.260 | 0.296,0.433,0.493     | 0.296,0.433,0.493 |
| Counter<br>Stain<br>(RGB)<br>OD            | 0.197,0.236,0.144     | 0.197,0.236,0.144 | 0.313,0.313,0.097     | 0.313,0.313,0.097 |
| Minimum<br>Tissue OD                       | 0.032                 | 0.032             | 0.005                 | 0.005             |
| Tissue<br>Edge                             | 0                     | 0                 | 0                     | 0                 |

|                                         |                |                   |                   |                   |
|-----------------------------------------|----------------|-------------------|-------------------|-------------------|
| Thickness                               |                |                   |                   |                   |
| Object BR                               | 11.5           | 0                 | 0.4               | 0                 |
| Object Contrast Radius                  | 5              | NA                | 4.493             | NA                |
| Object CT                               | 0.48           | NA                | 0.196             | NA                |
| Object Stain Min. OD                    | 0.155          | NA                | 0.117             | NA                |
| Stain Min. OD (strong, moderate, weak)  | NA             | 0.291,0.500,0.744 | NA                | 0.182,0.288,0.485 |
| Object Size (min, max $\mu\text{m}^2$ ) | 25.600,630.000 | NA                | 10.000,100000.000 | NA                |
| Object connect length ( $\mu\text{m}$ ) | 5              | NA                | 5                 | NA                |
| Object fill holes                       | False          | NA                | True              | NA                |

OD= optical density, BR= Blur radius, CT= Contrast Threshold

**Supplementary Table 3.** Raw data of final outputs for Tau CI/ $\text{mm}^2$  and TDP %AO from ROIs independently segmented by separate investigators.



| Case | Diagnosis | Region | Inclusion/mm <sup>2</sup><br>Investigator #1 | Inclusion/mm <sup>2</sup><br>Investigator #2 | Inclusion/mm <sup>2</sup><br>Investigator #3 |
|------|-----------|--------|----------------------------------------------|----------------------------------------------|----------------------------------------------|
| 1    | PiD       | MFG    | 52.05                                        | 59.78                                        | 61.23118333                                  |
|      |           | STG    | 30.52                                        | 43.91                                        | 50.69                                        |
|      |           | ACG    | 63.01                                        | 34.25                                        | 30.13                                        |
| 2    | PiD       | MFG    | 96.27                                        | 92.36                                        | 106.45                                       |
|      |           | STG    | 35.61                                        | 42.46                                        | 6.85                                         |
|      |           | ACG    | 0.00                                         | 0.00                                         | 2.76                                         |
| 3    | PiD       | MFG    | 64.38                                        | 47.82                                        | 86.29                                        |
|      |           | STG    | 78.83                                        | 70.57                                        | 92.82                                        |
|      |           | ACG    | 16.44                                        | 24.47                                        | 76.71                                        |
| 4    | PiD       | MFG    | 73.03                                        | 63.69                                        | 80.36                                        |
|      |           | STG    | 233.49                                       | 147.85                                       | 157.41                                       |
|      |           | ACG    | 28.76                                        | 27.43                                        | 12.34                                        |
| 5    | PiD       | MFG    | 266.89                                       | 184.10                                       | 268.88                                       |
|      |           | STG    | 152.04                                       | 163.00                                       | 168.48                                       |
|      |           | ACG    | 1.37                                         | 36.28                                        | 20.57                                        |
| 6    | PiD       | MFG    | 52.71                                        | 40.73                                        | 84.32                                        |
|      |           | STG    | 85.27                                        | 86.41                                        | 102.73                                       |
|      |           | ACG    | 45.78                                        | 25.01                                        | 54.97                                        |
| 7    | PiD       | MFG    | 134.89                                       | 125.51                                       | 134.43                                       |
|      |           | STG    | 97.48                                        | 108.63                                       | 75.48                                        |
|      |           | ACG    | 58.97                                        | 60.27                                        | 57.60                                        |
| 8    | PiD       | MFG    | 60.31                                        | 72.60                                        | 78.61                                        |
|      |           | STG    | 93.40                                        | 133.28                                       | 119.87                                       |
|      |           | ACG    | 153.28                                       | 150.57                                       | 137.74                                       |
| 9    | PiD       | MFG    | 108.89                                       | 124.28                                       | 98.72                                        |
|      |           | STG    | 56.19                                        | 28.76                                        | 35.61                                        |
|      |           | ACG    | 1.37                                         | 1.37                                         | 0.00                                         |
| 10   | PiD       | MFG    | 109.76                                       | 96.02                                        | 105.48                                       |
|      |           | STG    | 55.14                                        | 54.81                                        | 45.20                                        |

|             |                  |                                                                |                                    |                                    |                                          |
|-------------|------------------|----------------------------------------------------------------|------------------------------------|------------------------------------|------------------------------------------|
|             |                  | ACG                                                            | 102.73                             | 89.03                              | 101.37                                   |
| <b>11</b>   | PiD              | MFG                                                            | 131.03                             | 133.42                             | 131.41                                   |
|             |                  | STG                                                            | 102.73                             | 77.12                              | 52.79                                    |
|             |                  | ACG                                                            | 34.24                              | 36.98                              | 43.83                                    |
|             |                  | <b>Wilcoxon signed-rank<br/>median difference (bias) &gt;0</b> |                                    |                                    | <b>vs.#2 p&gt;0.3<br/>vs.#3 p&gt;0.6</b> |
| <b>Case</b> | <b>Diagnosis</b> | <b>Region</b>                                                  | <b>TDP %AO<br/>Investigator #1</b> | <b>TDP %AO<br/>Investigator #2</b> | <b>TDP %AO<br/>Investigator #3</b>       |
| <b>12</b>   | FLD-TDPC         | MFG                                                            | 0.48                               | 0.42                               | 0.32                                     |
|             |                  | STG                                                            | 0.70                               | 0.49                               | 0.88                                     |
|             |                  | ACG                                                            | 1.86                               | 1.76                               | 1.11                                     |
| <b>13</b>   | FLD-TDPC         | MFG                                                            | 0.47                               | 0.41                               | 0.46                                     |
|             |                  | STG                                                            | 0.28                               | 0.34                               | 0.37                                     |
|             |                  | ACG                                                            | 0.85                               | 1.09                               | 1.26                                     |
| <b>14</b>   | FLD-TDPC         | MFG                                                            | 0.07                               | 0.14                               | 0.34                                     |
|             |                  | STG                                                            | 1.48                               | 1.06                               | 1.11                                     |
|             |                  | ACG                                                            | 1.33                               | 1.20                               | 0.64                                     |
| <b>15</b>   | FLD-TDPC         | MFG                                                            | 0.66                               | 0.59                               | 0.59                                     |
|             |                  | STG                                                            | 0.16                               | 0.11                               | 0.21                                     |
|             |                  | ACG                                                            | 1.09                               | 0.97                               | 0.69                                     |
| <b>16</b>   | FLD-TDPC         | MFG                                                            | 0.58                               | 0.47                               | 0.91                                     |
|             |                  | STG                                                            | 0.43                               | 0.57                               | 0.67                                     |
|             |                  | ACG                                                            | 0.92                               | 1.19                               | 0.94                                     |
| <b>17</b>   | FLD-TDPC         | MFG                                                            | 0.15                               | 0.22                               | 0.28                                     |
|             |                  | STG                                                            | 0.39                               | 0.44                               | 1.25                                     |
|             |                  | ACG                                                            | 0.64                               | 0.81                               | 0.96                                     |
|             | FLD-TDPC         | MFG                                                            | 0.12                               | 0.16                               | 0.07                                     |

|                                                                      |          |     |                                                   |                               |                 |
|----------------------------------------------------------------------|----------|-----|---------------------------------------------------|-------------------------------|-----------------|
| <b>18</b>                                                            |          | STG | 0.60                                              | 0.60                          | 0.33            |
|                                                                      |          | ACG | 0.90                                              | 0.91                          | 0.57            |
| <b>19</b>                                                            | FLD-TDPC | MFG | 0.28                                              | 0.25                          | 0.21            |
|                                                                      |          | STG | 0.44                                              | 0.42                          | 0.59            |
|                                                                      |          | ACG | 0.49                                              | 0.67                          | 0.52            |
| <b>20</b>                                                            | FLD-TDPC | MFG | 1.35                                              | 1.18                          | 2.12            |
|                                                                      |          | STG | 0.60                                              | 0.63                          | 0.93            |
|                                                                      |          | ACG | 1.41                                              | 1.09                          | 1.67            |
| <b>21</b>                                                            | FLD-TDPC | MFG | 0.04                                              | 0.04                          | 0.02            |
|                                                                      |          | STG | 0.10                                              | 0.14                          | 0.17            |
|                                                                      |          | ACG | 0.10                                              | 0.25                          | 0.07            |
| <p><b>Wilcoxon signed-rank<br/>median difference (bias)&gt;0</b></p> |          |     | <p><b>vs. #2 p&gt;0.2<br/>vs. #3 p&gt;0.2</b></p> | <p><b>vs. #3 p&gt;0.2</b></p> | <p><b>-</b></p> |

**Supplementary Table 4. Negative Control and Normal Control Data.**

| <b>Case</b>           | <b>Tau CI/mm<sup>2</sup></b> | <b>Tau %AO</b> | <b>TDP DN/mm<sup>2</sup></b> | <b>TDP %AO</b> |
|-----------------------|------------------------------|----------------|------------------------------|----------------|
| <b>PiD #1 MFC NC</b>  | 0                            | 0.0051         | -                            | -              |
| <b>PiD #1 MFC NC</b>  | 0                            | 0.0002         | -                            | -              |
| <b>PiD #1 MFC NC</b>  | 0                            | 0.0002         | -                            | -              |
| <b>PiD #1 MFC NC</b>  | 0                            | 0.0003         | -                            | -              |
| <b>PiD #1 MFC NC</b>  | 0                            | 0.0000         | -                            | -              |
| <b>AVERAGE PiD NC</b> | <b>0</b>                     | <b>0.0012</b>  | <b>-</b>                     | <b>-</b>       |

|                        |          |               |            |               |
|------------------------|----------|---------------|------------|---------------|
| <b>TDPC #1 MFC NC</b>  | -        | -             | 1.4        | 0.0049        |
| <b>TDPC #2 MFC NC</b>  | -        | -             | 3.2        | 0.0055        |
| <b>TDPC #3 MFC NC</b>  | -        | -             | 1.4        | 0.0037        |
| <b>TDPC #4 MFC NC</b>  | -        | -             | 0          | 0.0013        |
| <b>TDPC #5 MFC NC</b>  | -        | -             | 0          | 0.0007        |
| <b>AVERAGE TDPC NC</b> | -        | -             | <b>1.2</b> | <b>0.0032</b> |
| <b>Normal #1 MFC</b>   | 0        | 0.0064        | 0          | 0.0018        |
| <b>Normal #2 MFC</b>   | 0        | 0.0030        | 0          | 0.0016        |
| <b>Normal #3 MFC</b>   | 0        | 0.0388        | 4.3        | 0.0029        |
| <b>Normal #4 MFC</b>   | 0        | 0.0002        | 0          | 0.0010        |
| <b>Normal #5 MFC</b>   | 0        | 0.0028        | 0          | 0.0002        |
| <b>AVERAGE Normal</b>  | <b>0</b> | <b>0.0102</b> | <b>0.9</b> | <b>0.0015</b> |

NC= negative control (IHC stain in absence of primary antibody).

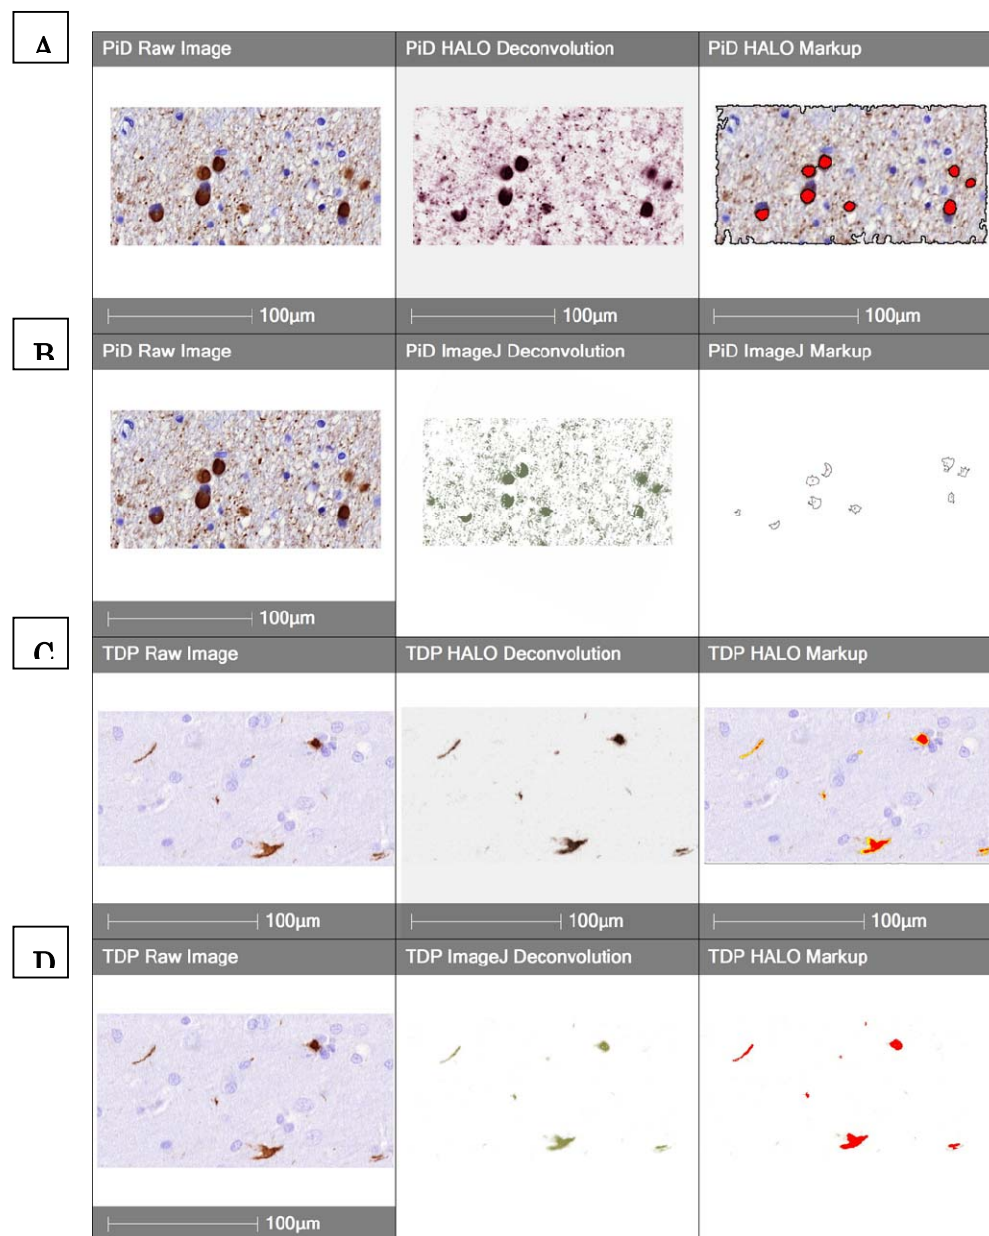

**Supplementary Figure 3. Comparison of HALO and IMAGEJ digital image analysis platforms.** Photomicrographs depict representative images from digital image analysis comparison between HALO (rows A, C) and IMAGEJ (rows C,D) for Tau CI object detection (rows A, B) and TDP %AO (rows C,D). Conversion of optimal algorithms into equivalent IMAGEJ input parameters results in a similar color deconvolution between platforms (column 2) and Tau CI detection (black and white outlines in row B column 3) and TDP %AO (red overlay in row D column 3) to HALO

(red overlay in row A column 3 and yellow/orange/red overlay in row C column 3).

**Supplementary Table 5. Image J Comparison Data**

| Case    | Region | Tau CI/image<br>HALO | Tau CI/image<br>IMAGEJ | TDP %AO/image<br>HALO | TDP %AO/image<br>IMAGEJ |
|---------|--------|----------------------|------------------------|-----------------------|-------------------------|
| PiD #10 | CING   | 7                    | 9                      | -                     | -                       |
| PiD #3  | STC    | 3                    | 2                      | -                     | -                       |
| PiD#6   | STC    | 4                    | 4                      | -                     | -                       |
| PiD#11  | CING   | 3                    | 2                      | -                     | -                       |
| PiD#9   | MFC    | 2                    | 4                      | -                     | -                       |
| TDPC#7  | STC    | -                    | -                      | 2.11                  | 1.03                    |
| TDPC#6  | CING   | -                    | -                      | 0.98                  | 0.89                    |
| TDPC#4  | MFC    | -                    | -                      | 1.07                  | 1.07                    |
| TDPC#10 | STC    | -                    | -                      | 1.35                  | 1.29                    |
| TDPC#9  | STC    | -                    | -                      | 2.18                  | 2.31                    |

\* Average within-subject %CV for Tau CI detection=24.3%, TDP %AO= 12.5%
